# Supplementary material for: Synthesis, structural characterisation and solution chemistry of ruthenium(III) triazole-thiadiazine complexes
Source: Royal Society of Chemistry journal article supplement (doi:10.1039/b823271g), 2009-01-01
Supplement: b823271g.pdf [file b823271g.pdf]

**Supporting Information for**

**Synthesis, Structural Characterization and Solution Chemistry of  
Ruthenium(III) Triazole-Thiadiazine Complexes**

Massimiliano Delferro,<sup>a</sup> Luciano Marchiò,\*<sup>a</sup> Matteo Tegoni,<sup>a</sup> Saverio Tardito,<sup>b</sup>  
Renata Franchi-Gazzola,<sup>b</sup> Maurizio Lanfranchi<sup>a</sup>

<sup>a</sup> *Dipartimento di Chimica Generale ed Inorganica, Chimica Analitica, Chimica Fisica, Università di Parma,  
Viale G.P. Usberti 17/A, 43100, Parma, Italy.*

<sup>b</sup> *Dipartimento di Medicina Sperimentale, Sezione di Patologia Generale e Clinica, Università degli Studi di  
Parma, Via Volturno 39, I-43100 Parma, Italy*

E-mail: [marchio@unipr.it](mailto:marchio@unipr.it)

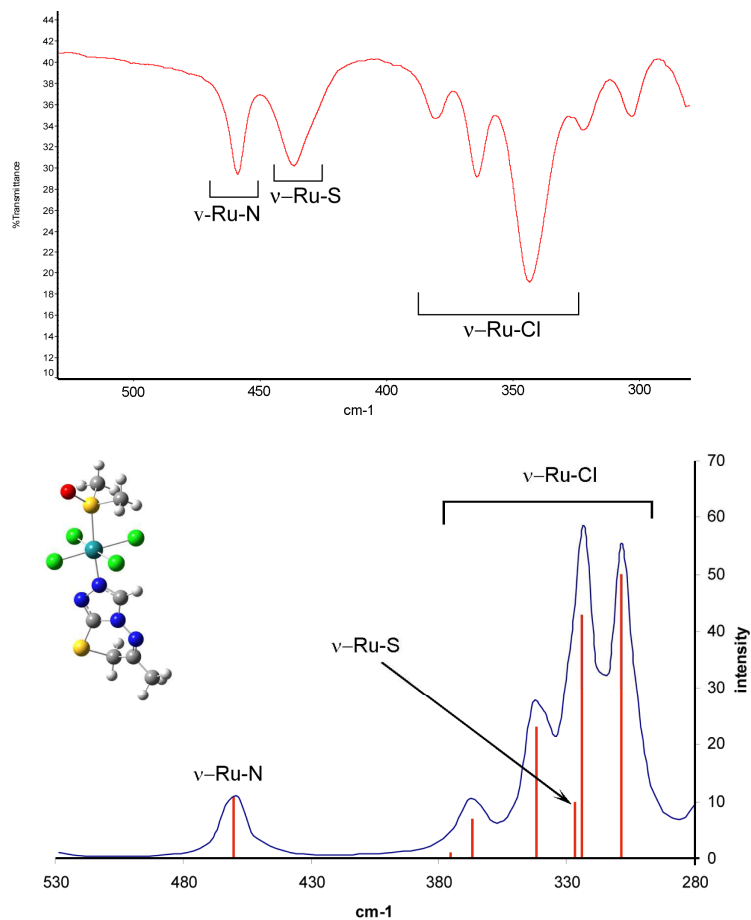

**Figure S1.** FAR-IR spectrum of Na[RuCl<sub>4</sub>(L1)(dmsol)] (**1**), CsI disk (above); calculated IR spectra b3lyp/lanl2dz(Ru)-6-31G(C H Cl N O S) (below).<sup>S1</sup> The discrepancy between the Ru-S stretching frequency is due to the difference between the experimental geometry ( $d(\text{Ru-S})=2.310(3)\text{ \AA}$ ) and the optimized geometry ( $d(\text{Ru-S})=2.531\text{ \AA}$ ). According to this, in the optimized geometry the Ru-S bond is weakened with respect to the X-ray structure. The discrepancy between the calculated and experimental geometry for the other coordination distances are less than  $0.15\text{ \AA}$ .

**Table S1.** Observed frequencies ( $\text{cm}^{-1}$ ) for the Ru-D (D = donor atom) in Ru(III) complexes.

|                                                                            | $\nu(\text{Ru-N})$ | $\nu(\text{Ru-S})$ | $\nu(\text{Ru-Cl})$ |
|----------------------------------------------------------------------------|--------------------|--------------------|---------------------|
| $[(\text{DMSO})_2\text{H}][\text{trans-RuCl}_4(\text{DMSO})_2]^{\text{a}}$ | -                  | 415                | 345, 329            |
| $\text{Na}[\text{RuCl}_4(\text{DMSO})(\text{L1})]$ ( <b>1</b> )            | 458                | 436                | 364, 343            |
| $\text{Na}[\text{RuCl}_4(\text{DMSO})(\text{L2})]$ ( <b>2</b> )            | 448                | 431                | 356, 332            |

a): ref.: S2

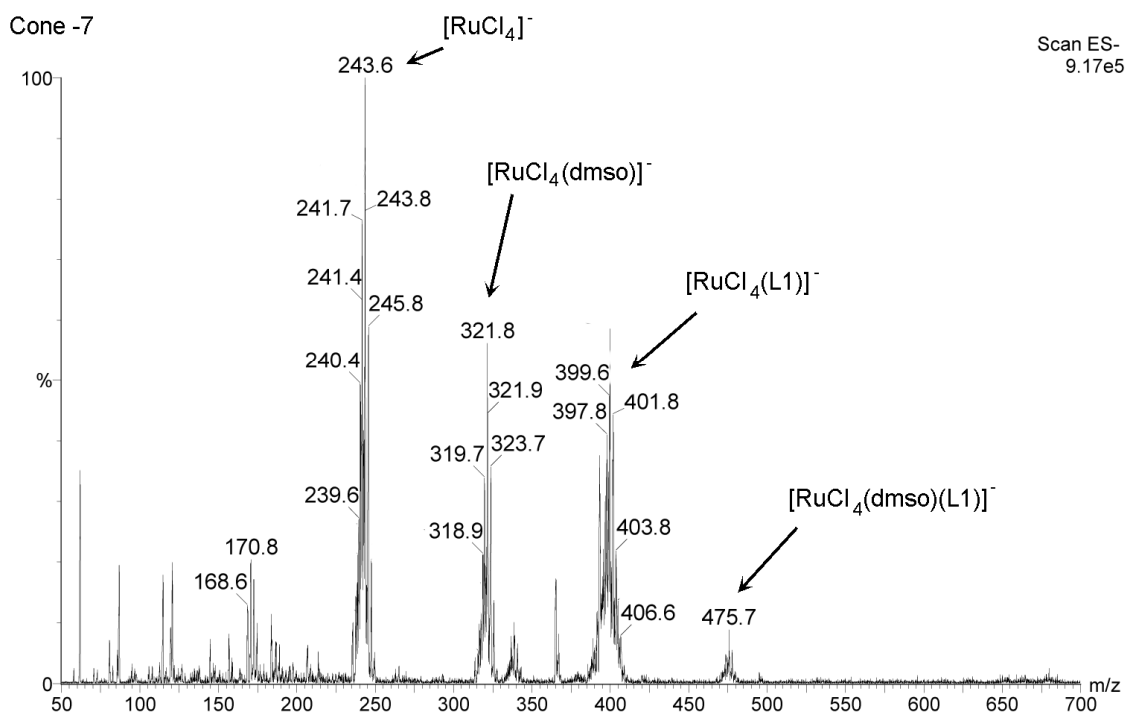

**Figure S2.** Negative ESI-MS spectrum of  $\text{Na}[\text{trans-RuCl}_4(\text{dmsO})(\text{L1})]$  (**1**) dissolved in acetonitrile.

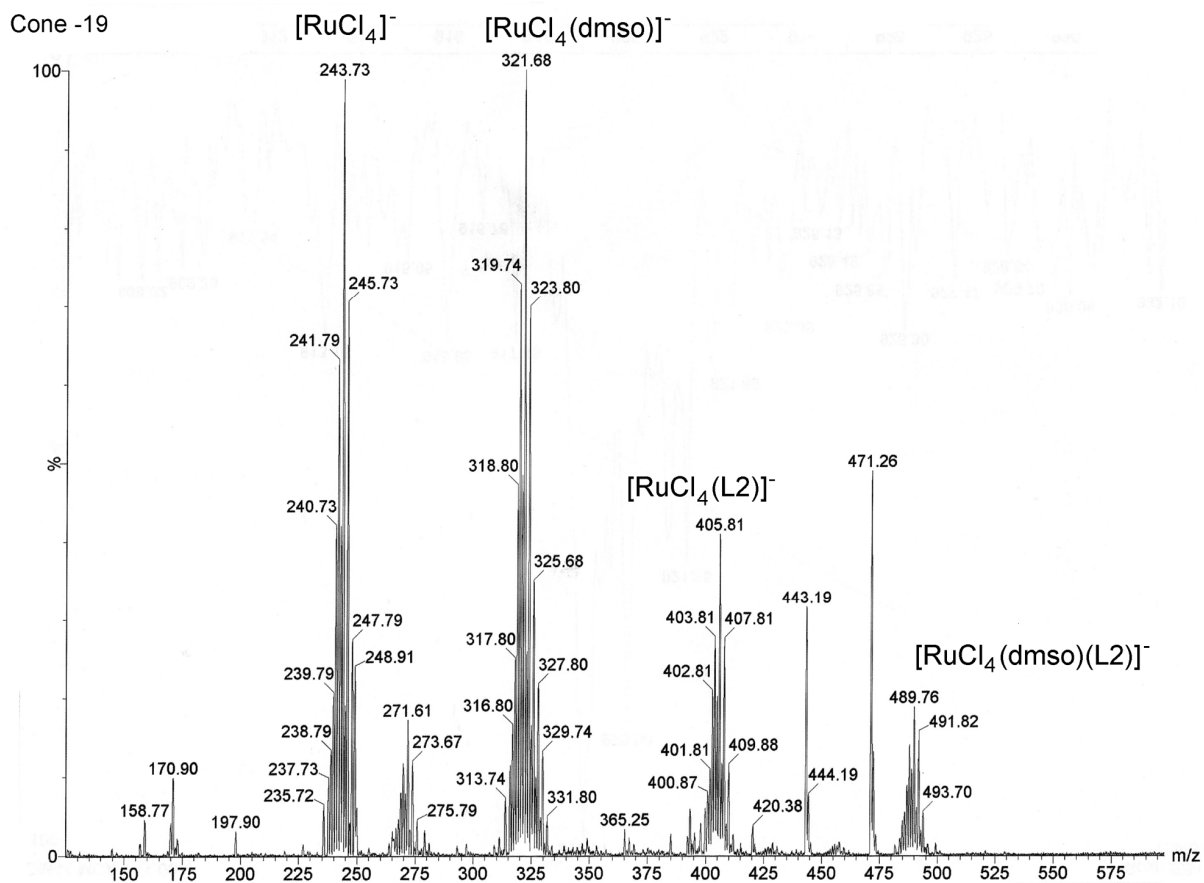

**Figure S3.** Negative ESI-MS spectrum of  $\text{Na}[\text{trans-RuCl}_4(\text{dmsO})(\text{L2})]^-$  (**2**) dissolved in acetonitrile.

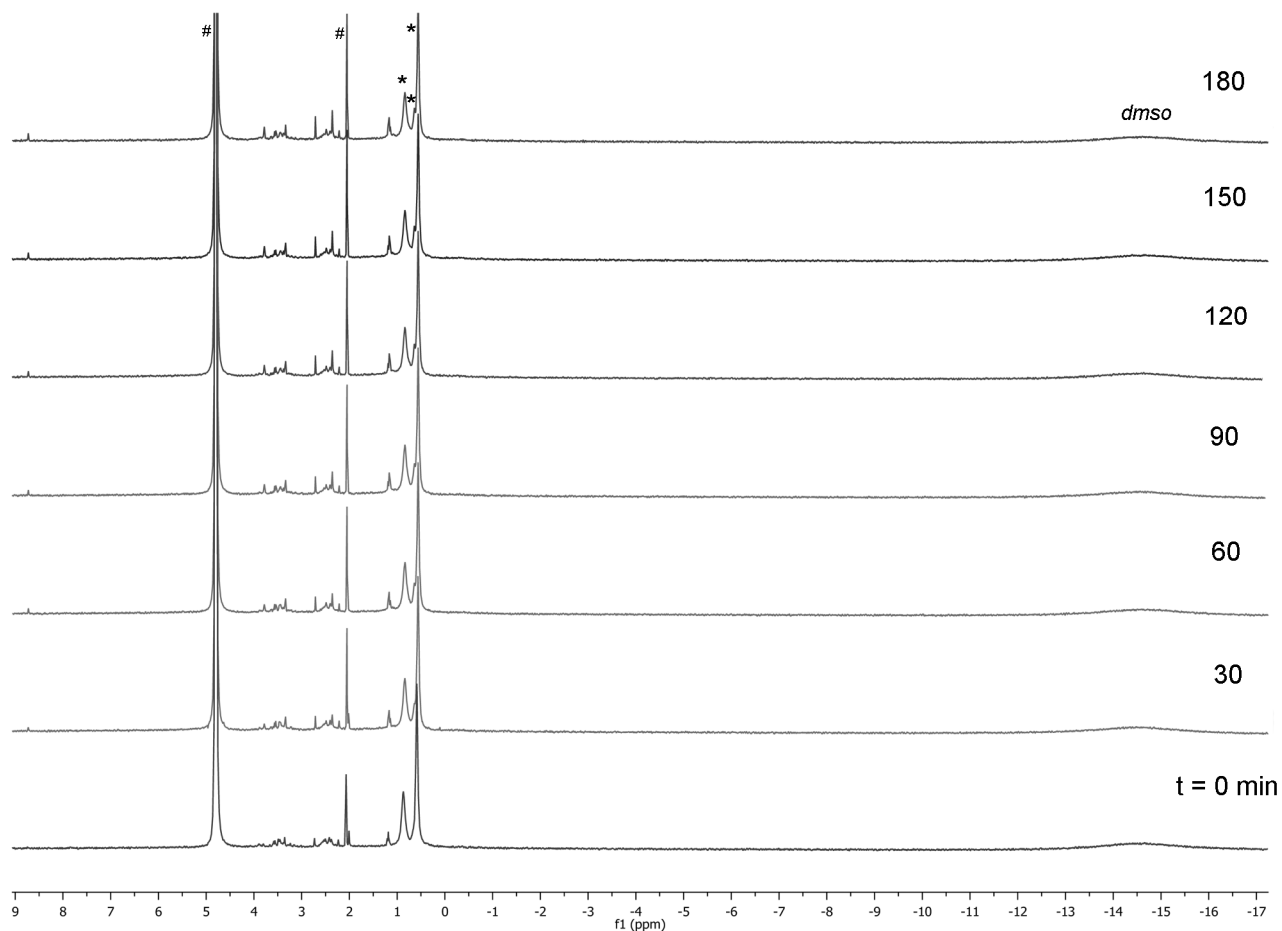

**Figure S4.** Stack plot of the <sup>1</sup>H NMR spectra of **1** in D<sub>2</sub>O recorded in the 0-180 min interval. \* = coordinated ligand signals. # = water and acetone.

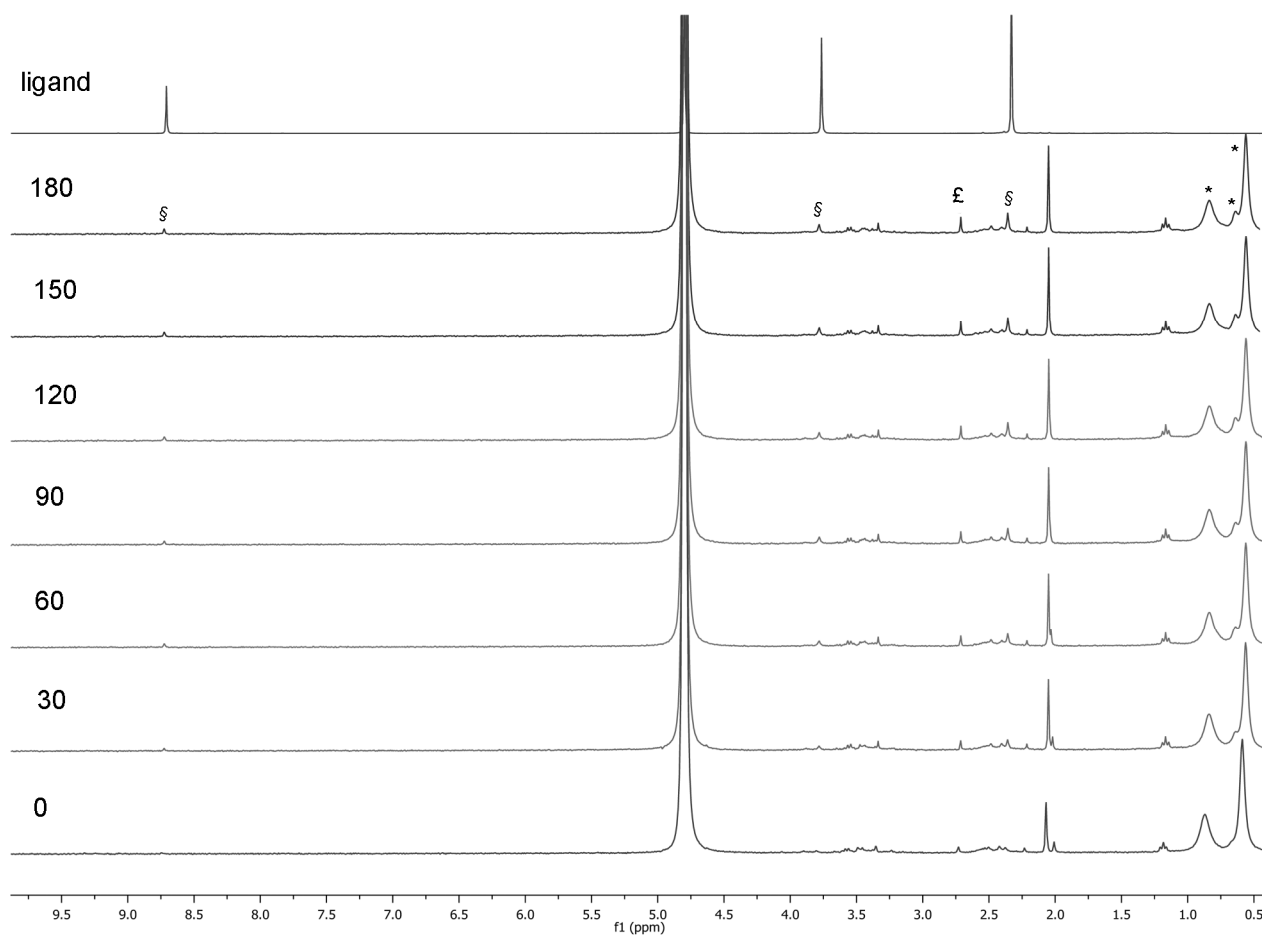

**Figure S5.** Stack plot of the <sup>1</sup>H NMR spectra of **1** in D<sub>2</sub>O recorded in the 0-180 min interval, together with the free ligand spectrum in D<sub>2</sub>O. \* = coordinated ligand signals, § = free ligand signals, £ = free DMSO signal (2.71 ppm, ref. S3).

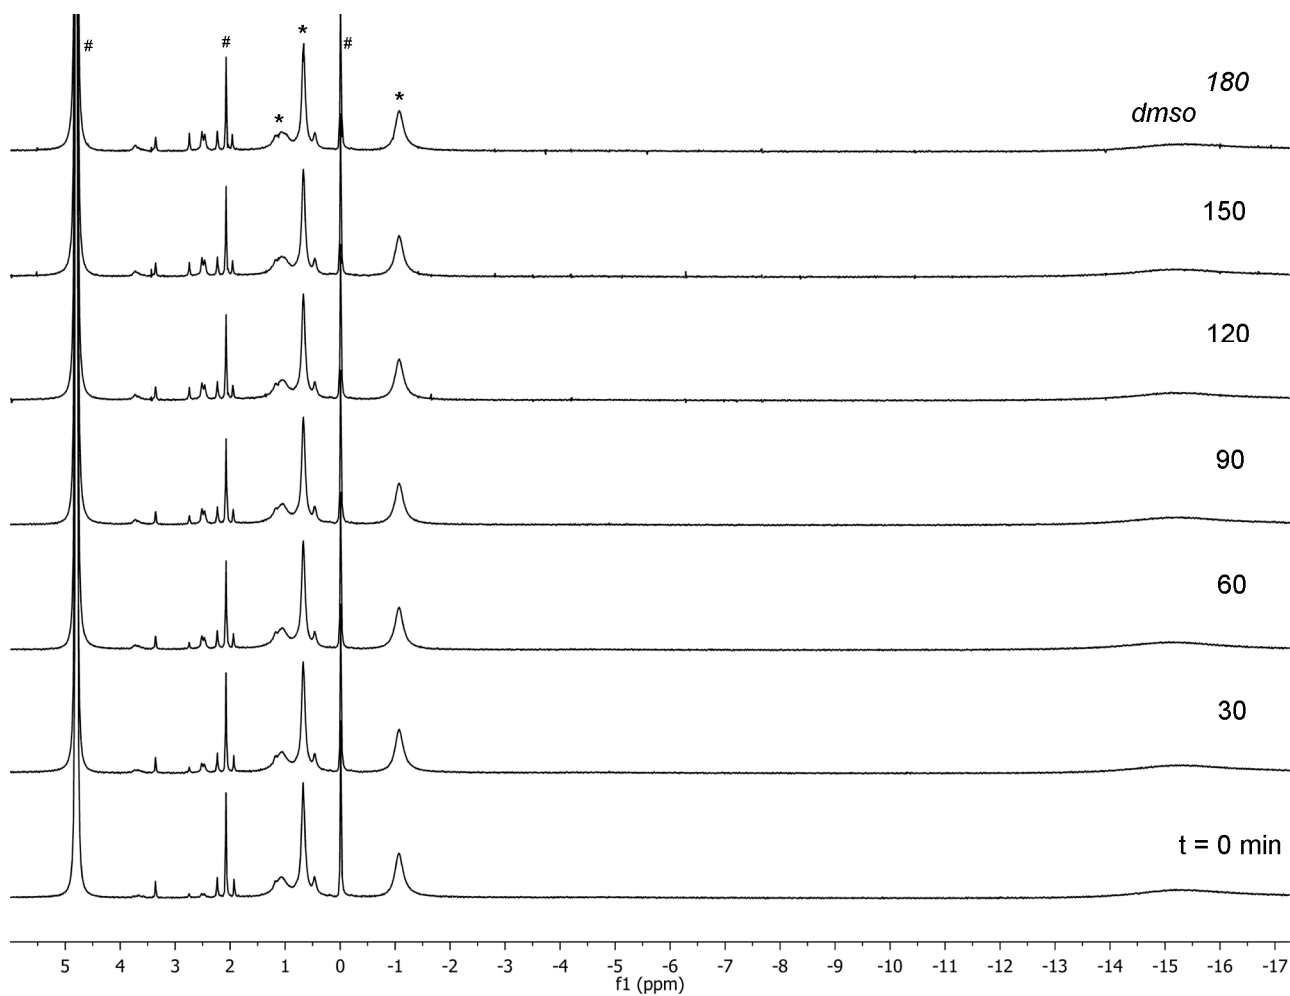

**Figure S6.** Stack plot of the <sup>1</sup>H NMR spectra of **2** in D<sub>2</sub>O recorded in the 0-180 min interval. \* = coordinated ligand signals. # = water, acetone and 3-(trimethylsilyl)propane sulfonate as reference.

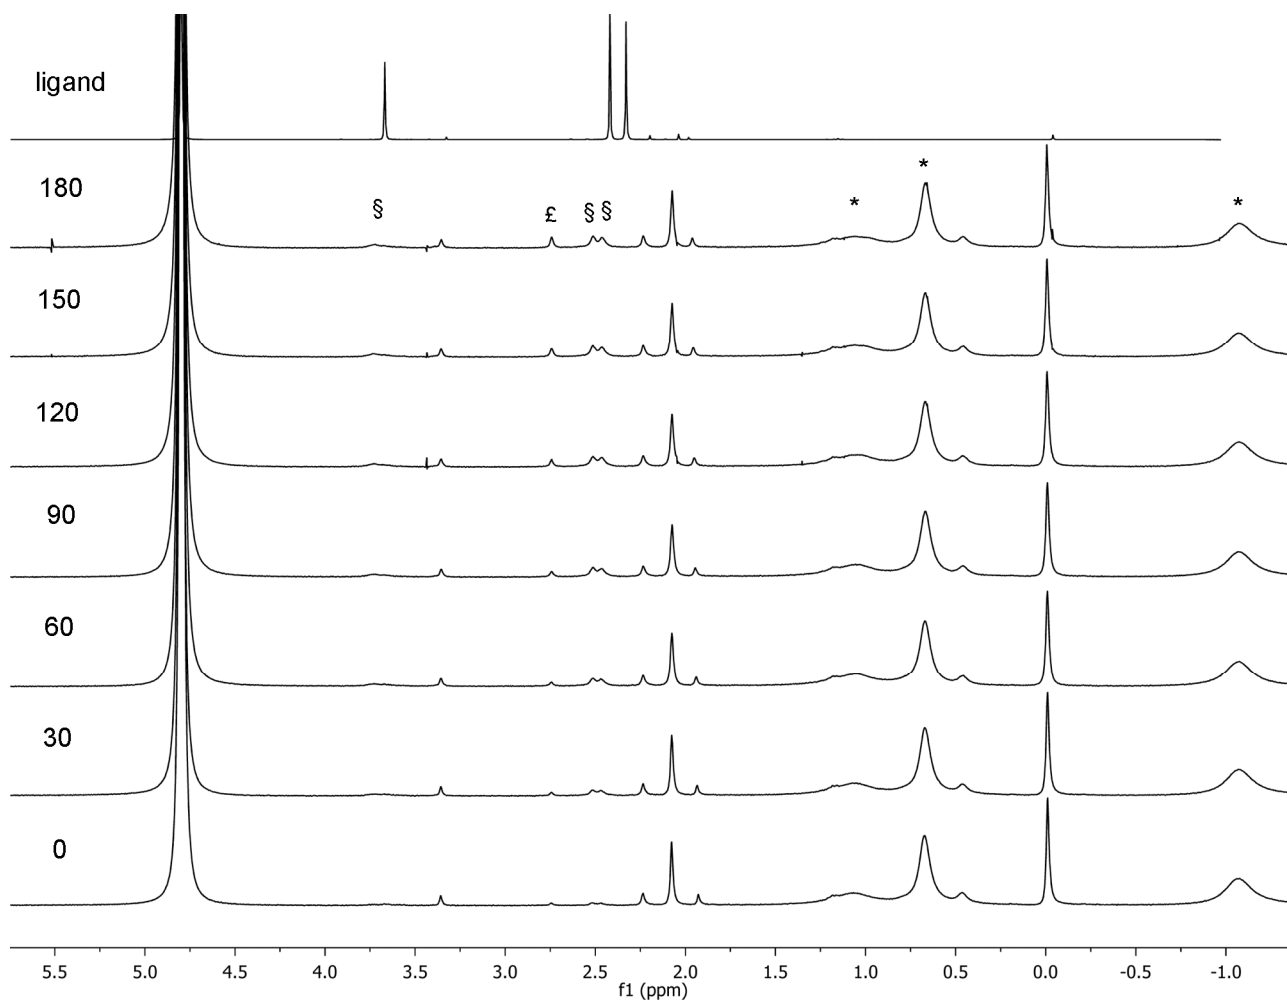

**Figure S7.** Stack plot of the <sup>1</sup>H NMR spectra of **2** in D<sub>2</sub>O recorded in the 0-180 min interval, together with the free ligand spectrum in D<sub>2</sub>O. \* = coordinated ligand signals, § = free ligand signals, £ = free DMSO signal (2.71 ppm, ref. S3).



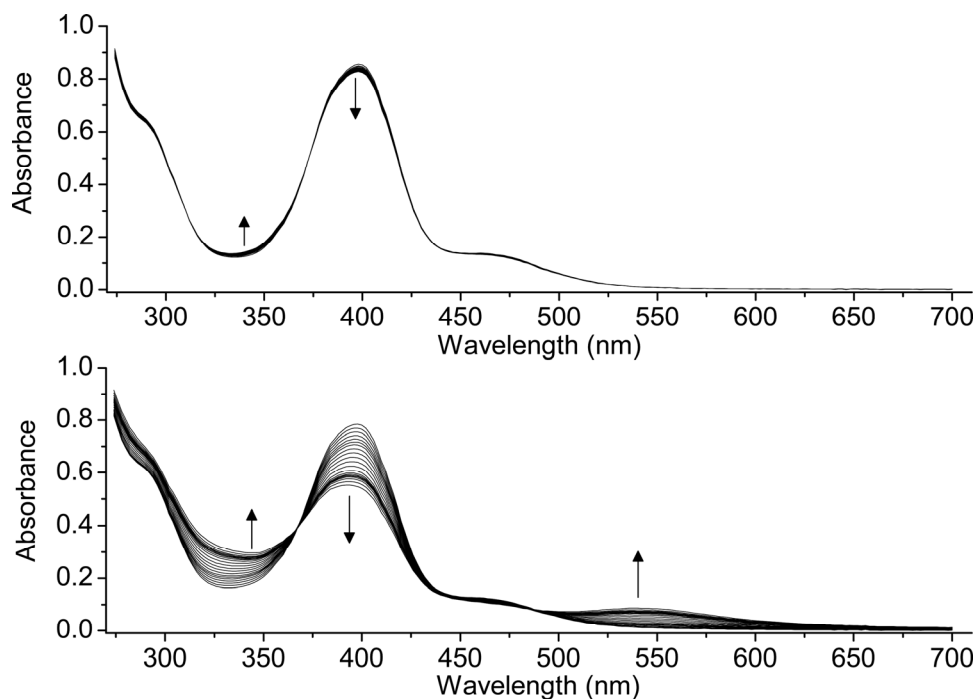

**Figure S8.** Upper diagram: UV-Vis spectra of  $\text{Na}[\text{RuCl}_4(\text{dmsO})(\text{L}2)]$  (**2**) in water at 7.5 min interval (0-170 min after dissolution). Lower diagram: UV-Vis spectra of **2** in water at 180 min interval (540-3000 min after dissolution).

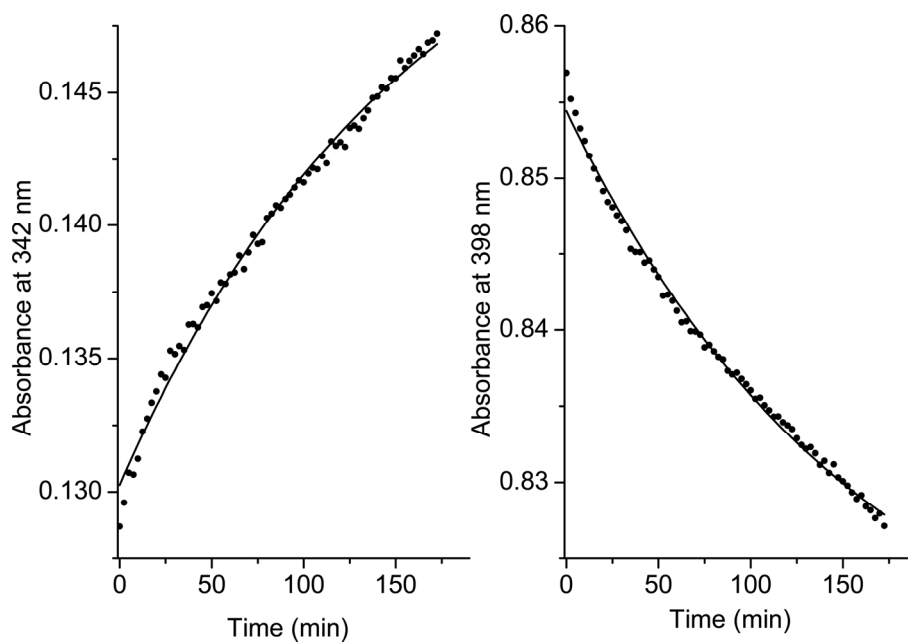

**Figure S9.** Experimental (dots) and calculated (lines) absorbances for the hydrolytic reaction of  $\text{Na}[\text{RuCl}_4(\text{dmsO})(\text{L}2)]$  (**2**) in water (0-170 min after dissolution) at 342 and 398 nm.

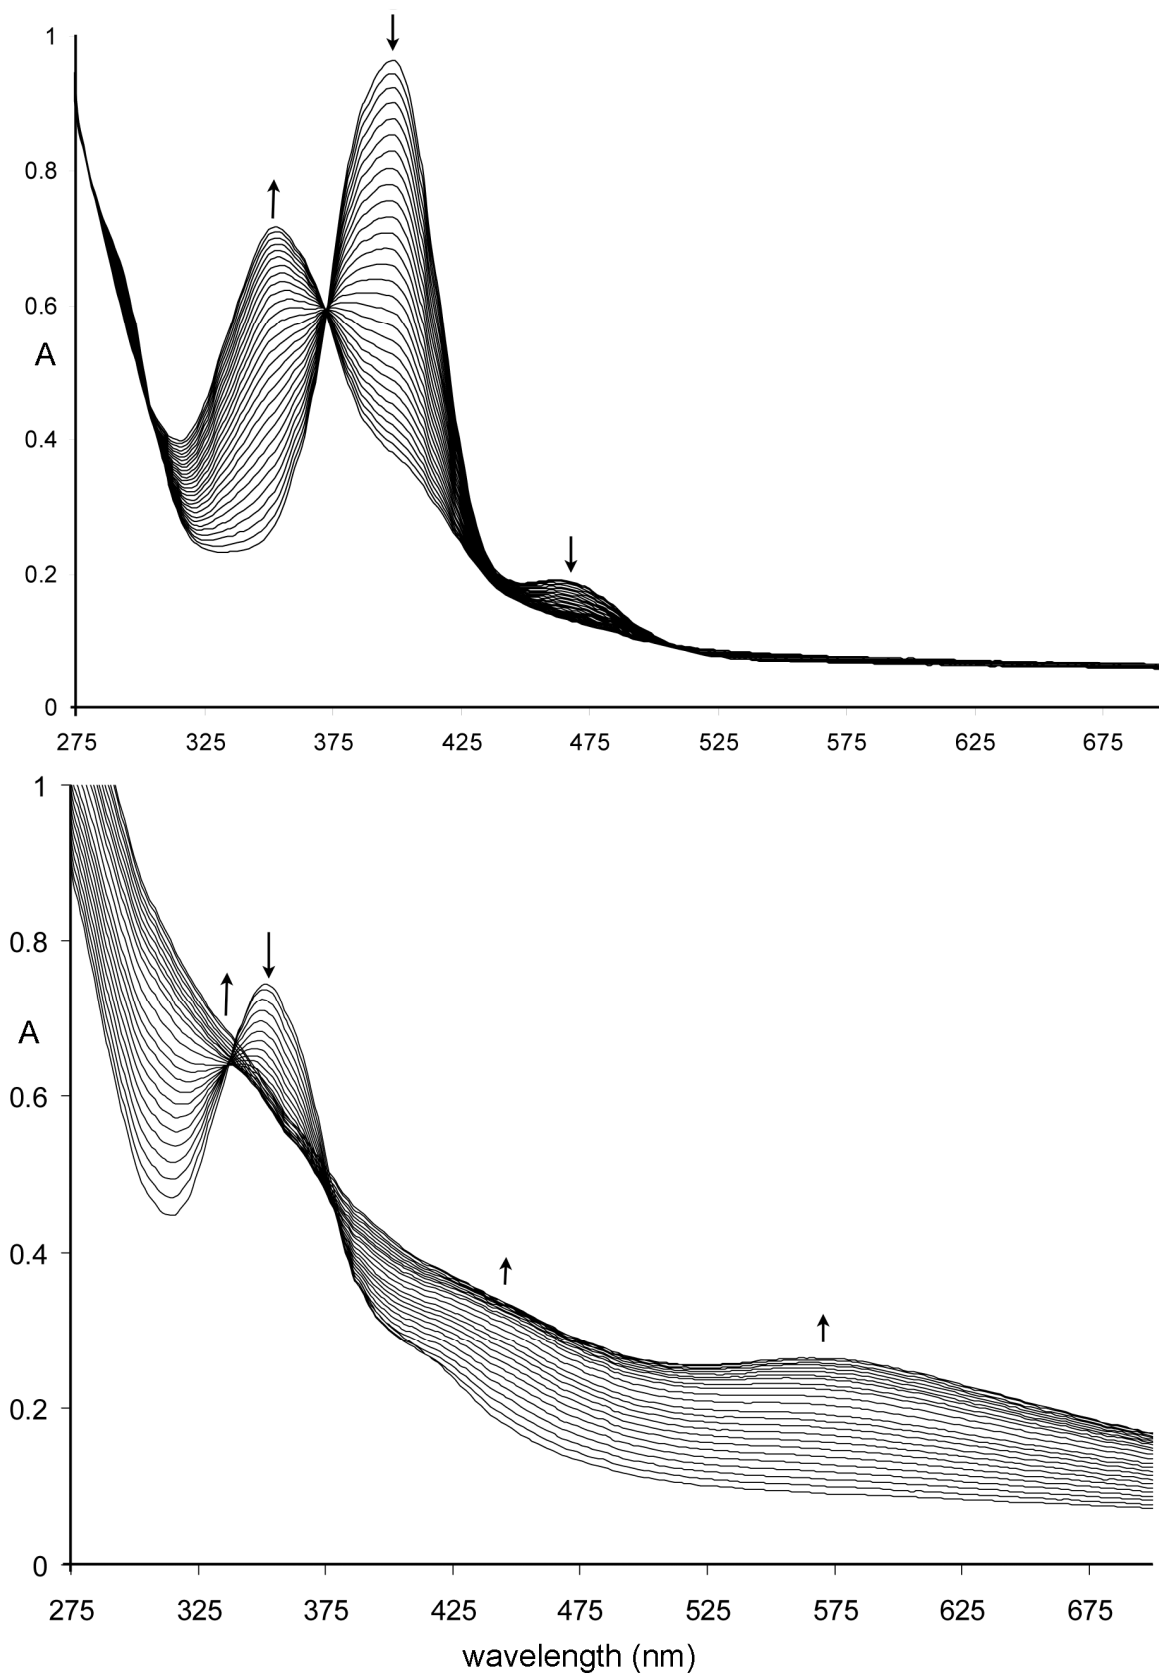

**Figure S10.** Upper diagram: UV-Vis spectra of Na[RuCl<sub>4</sub>(dmsO)(L1)] (**1**) in buffered water (pH = 7.4) at 60 sec interval (0-30 min after dissolution). Lower diagram: UV-Vis spectra of **1** in buffered water (pH = 7.4) at 120 sec interval (32-180 min after dissolution).

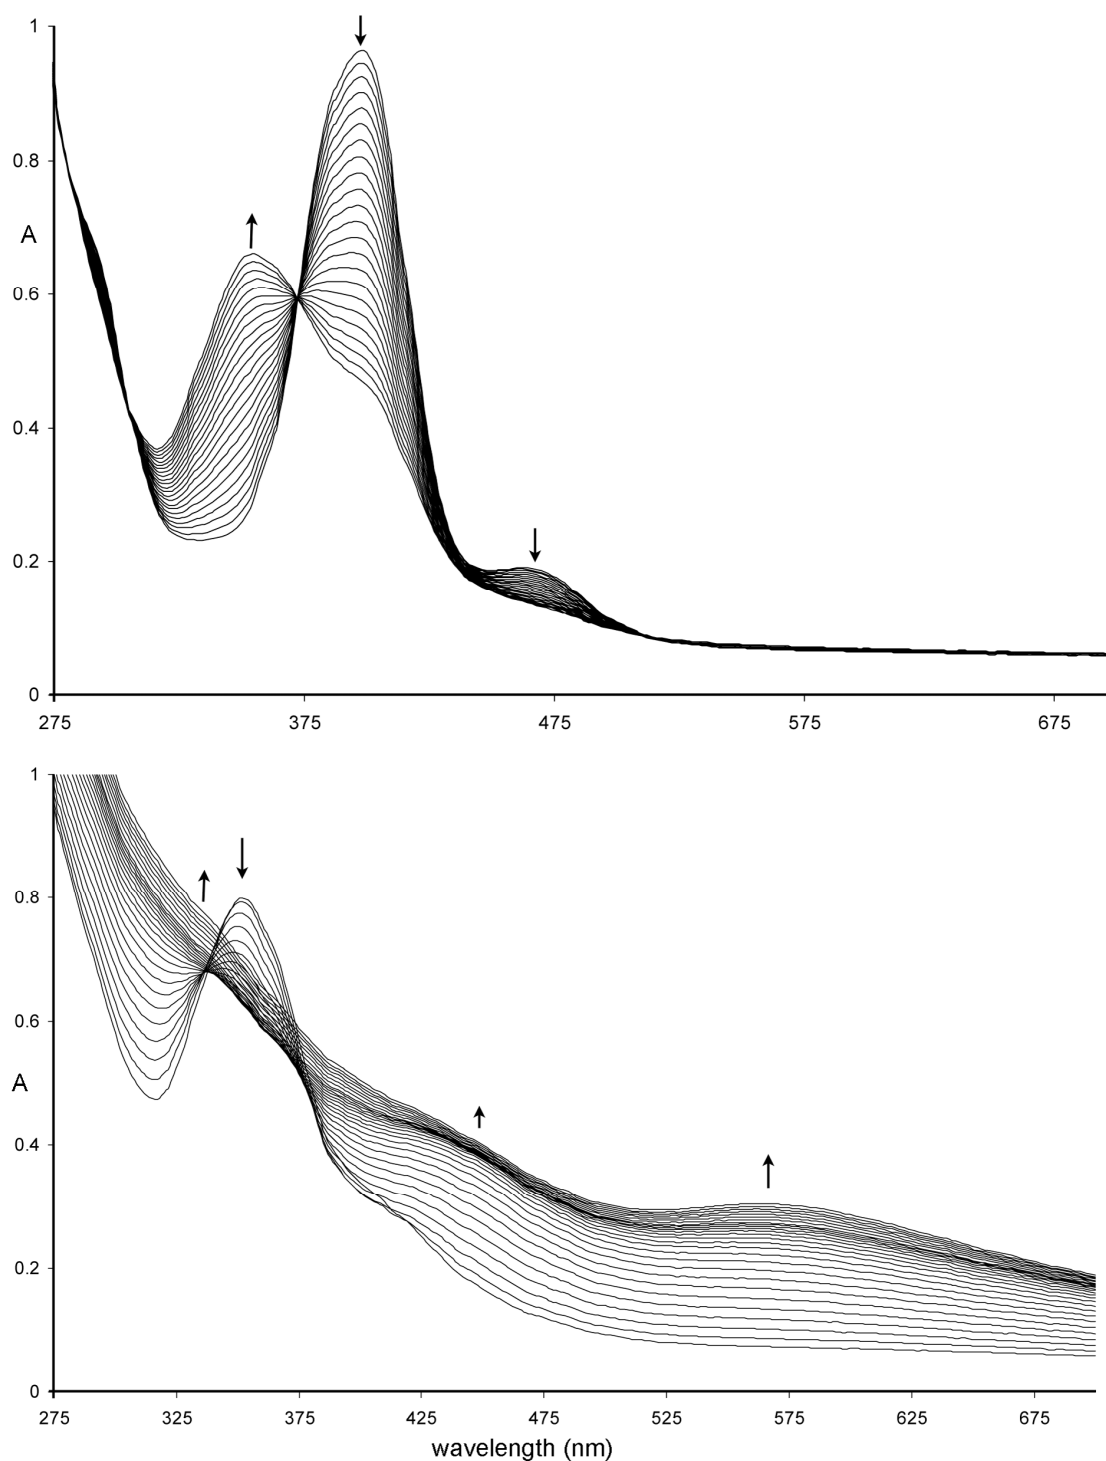

**Figure S11.** Upper diagram: UV-Vis spectra of  $\text{Na}[\text{RuCl}_4(\text{dmsO})(\text{L}2)]$  (**2**) in buffered water (pH = 7.4) at 60 sec interval (0-26 min after dissolution). Lower diagram: UV-Vis spectra of **2** in buffered water (pH = 7.4) at 120 sec interval (28-180 min after dissolution).

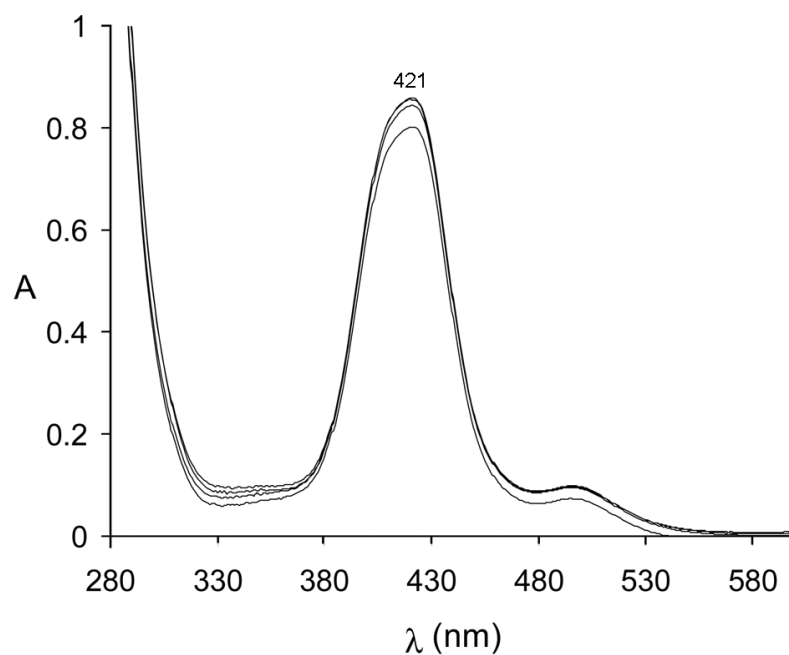

**Figure S12.** Solvolysis of Na[RuCl<sub>4</sub>(dms)<sub>2</sub>] in dms; t = 0, 1, 3, 6, 24 h. Conc. = 2 x 10<sup>-4</sup> M.

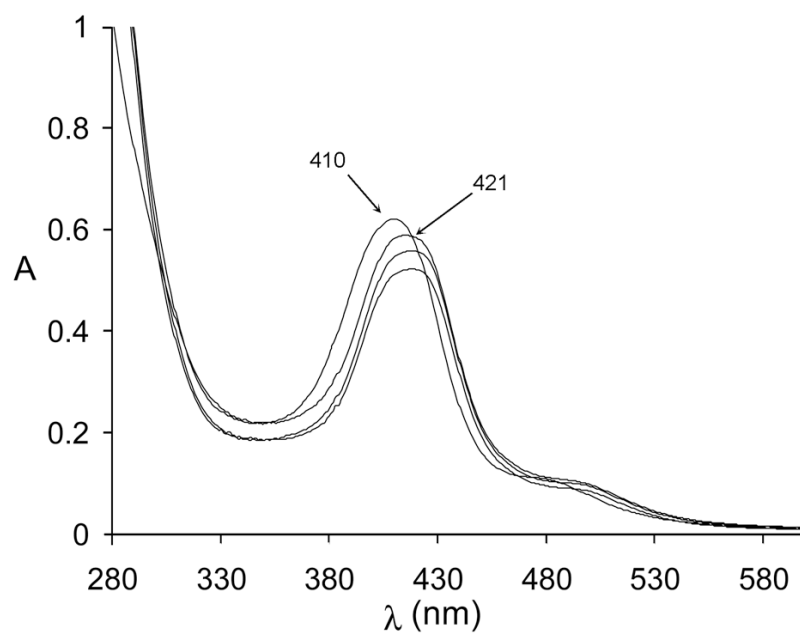

**Figure S13.** Solvolysis of Na[*trans*-RuCl<sub>4</sub>(dms)(L1)] (**1**) in dms; t = 0, 1, 3, 6, 24 h. Conc. = 2 x 10<sup>-4</sup> M. At t = 0, λ<sub>max</sub> = 410 nm.

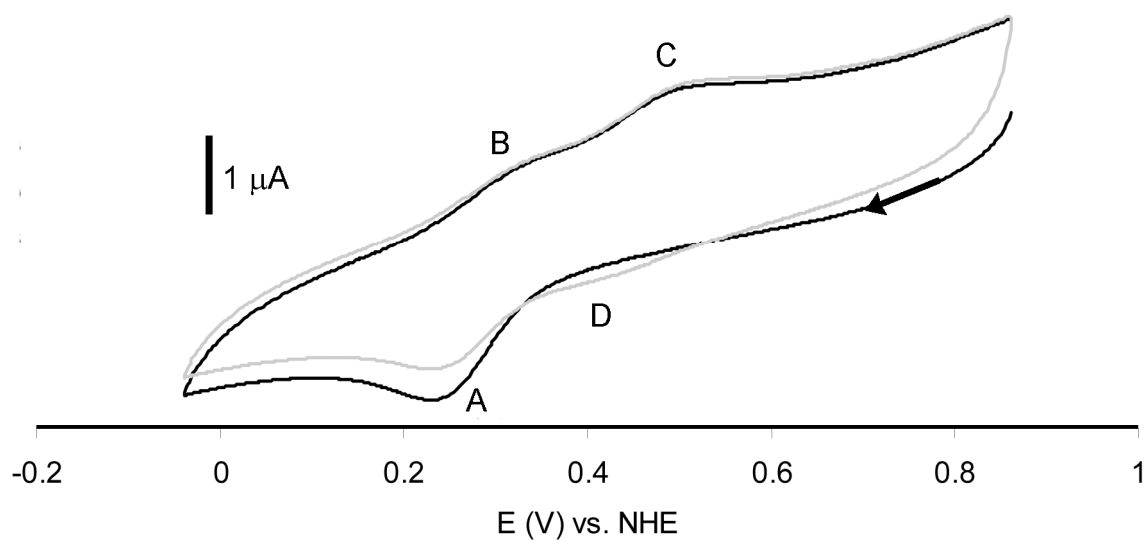

**Figure S14.** Cyclic voltammograms of a  $5 \times 10^{-4}$  M solutions of **2** dissolved in water. Supporting electrolyte:  $\text{KNO}_3$  0.1 M. Scan rate: 25 mV/s. First scan (black line), second scan (gray line).

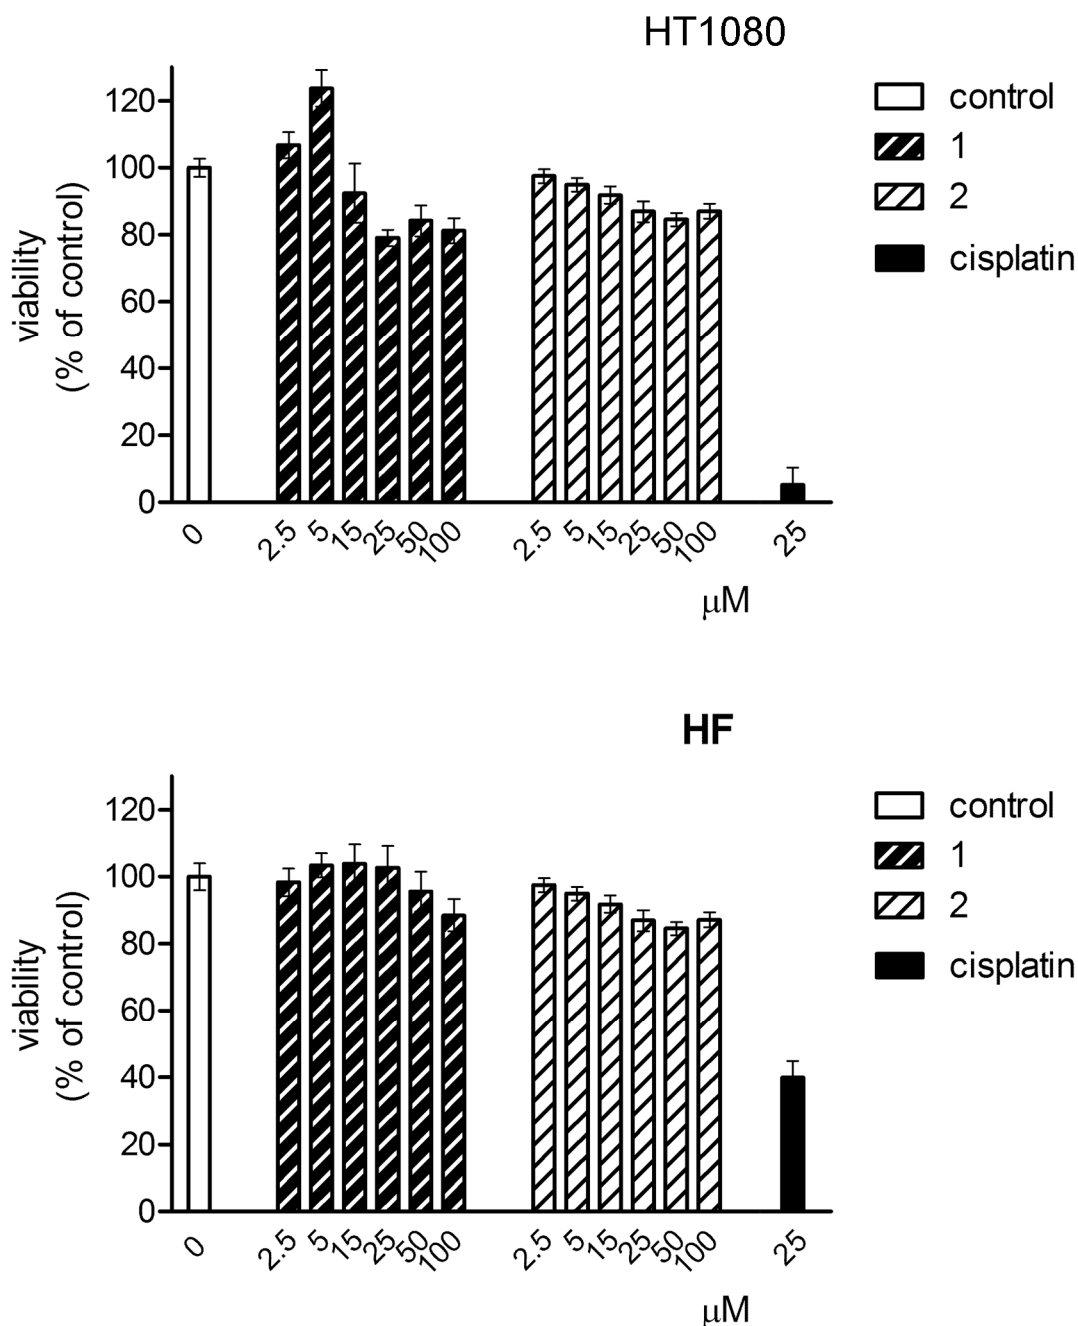

**Figure S15.** Dose-response plot obtained after a 48 h incubation of HT1080 and HF cells with the indicated concentrations of **1** and **2**. The effect of *cis*-platin on both cell lines is reported for comparison.

#### References.

S1 Frisch, M. J.; Trucks, G. W.; Schlegel, H. B.; Scuseria, G. E.; Robb, M. A.; Cheeseman, J. R.; Montgomery, J. A., Jr.; Vreven, T.; Kudin, K. N.; Burant, J. C.; Millam, J. M.; Iyengar, S. S.; Tomasi, J.; Barone, V.; Mennucci, B.; Cossi, M.; Scalmani, G.; Rega, N.; Petersson, G. A.; Nakatsuji, H.; Hada, M.; Ehara, M.; Toyota, K.; Fukuda, R.; Hasegawa, J.; Ishida, M.; Nakajima,

T.; Honda, Y.; Kitao, O.; Nakai, H.; Klene, M.; Li, X.; Knox, J. E.; Hratchian, H. P.; Cross, J. B.; Adamo, C.; Jaramillo, J.; Gomperts, R.; Stratmann, R. E.; Yazyev, O.; Austin, A. J.; Cammi, R.; Pomelli, C.; Ochterski, J. W.; Ayala, P. Y.; Morokuma, K.; Voth, G. A.; Salvador, P.; Dannenberg, J. J.; Zakrzewski, V. G.; Dapprich, S.; Daniels, A. D.; Strain, M. C.; Farkas, O.; Malick, D. K.; Rabuck, A. D.; Raghavachari, K.; Foresman, J. B.; Ortiz, J. V.; Cui, Q.; Baboul, A. G.; Clifford, S.; Cioslowski, J.; Stefanov, B. B.; Liu, G.; Liashenko, A.; Piskorz, P.; Komaromi, I.; Martin, R. L.; Fox, D. J.; Keith, T.; Al-Laham, M. A.; Peng, C. Y.; Nanayakkara, A.; Challacombe, M.; Gill, P. M. W.; Johnson, B.; Chen, W.; Wong, M. W.; Gonzalez, C.; Pople, J. A., Gaussian 03, revision C.02; Gaussian, Inc.: Wallingford CT, **2004**.

S2 E. Alessio, G. Balducci, M. Calligaris, G. Costa, W. M. Attia and G. Mestroni, *Inorg. Chem.*, 1991, **30**, 609.

S3 H. E. Gottlieb, V. Kotlyar and A. Nudelman, *J. Org. Chem.*, 1997, **62**, 7512.
